# Supplementary material for: Opposing Actions of Octopamine and Tyramine on Honeybee Vision
Source: MDPI journal article supplement (doi:10.3390/biom11091374), 2021-09-17
Supplement: s1 [file s1]

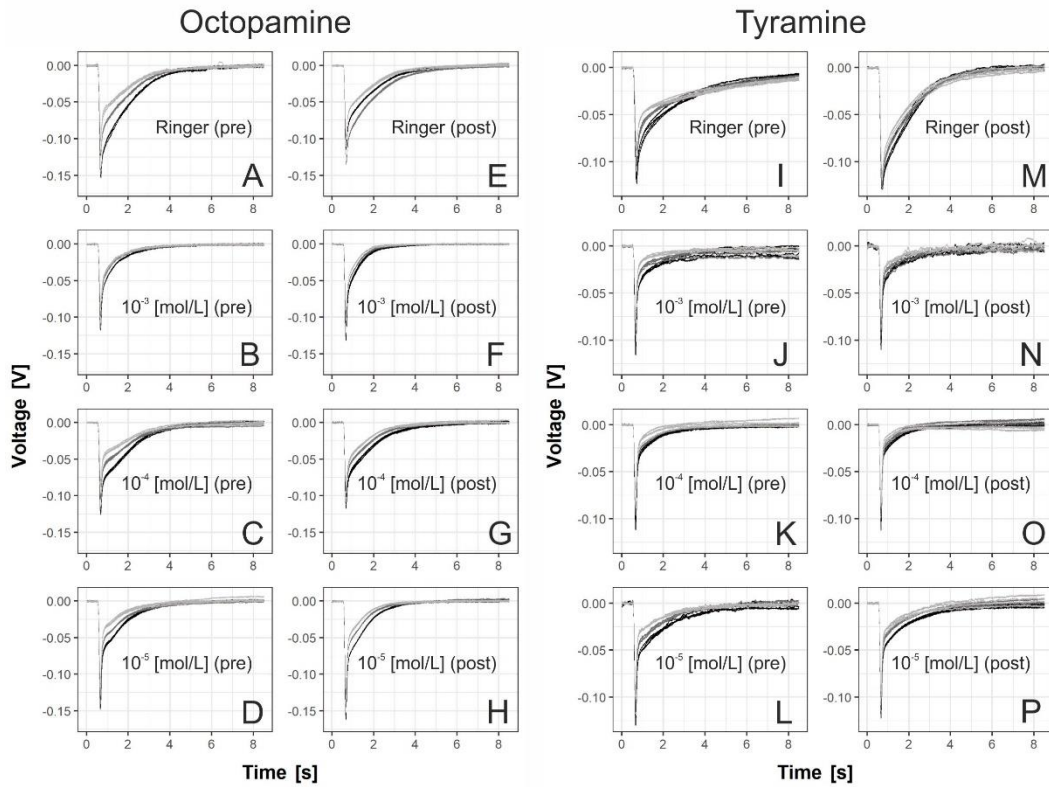

**Figure S1.** Raw data of eight example bees for the ERG experiments. Different colours show the different light intensities (light grey–36%, grey–59%, black–100%) and each pair of pre and post graphs represents one individual. (A–H): Receptor activity in response to four trials of each light intensity before (pre; A–D) and after (post; E–H) octopamine application. The upper 2 panels (A and E) illustrate the Ringer control. (I–P): Same as A–H but for tyramine application. Note: the four repetitions of each intensity induce almost identical activity, illustrating our reliable recording and stimulus application.

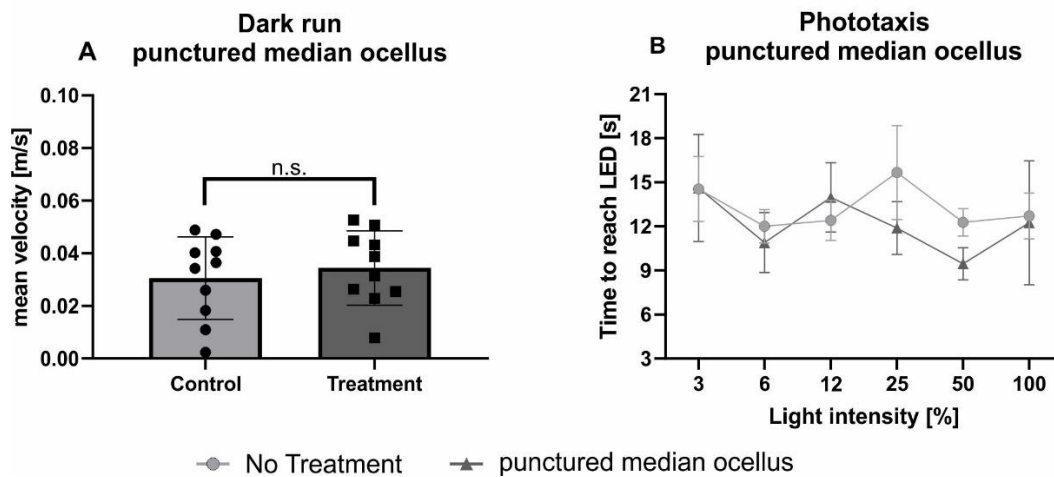

**Figure S2.** Puncturing the median ocellus does not affect mean walking velocity in the dark arena or walking time towards the switched-on LEDs. Control bees are shown in black. Honeybees with a punctured median ocellus are shown in grey. A: Average velocity (mean + standard deviation) of honeybees during one minute of constant movement in the dark arena. Groups did not differ significantly in their walking velocity in the dark ( $T = 0.58$ ,  $n_{\text{tyramine}} = 10$ ,  $n_{\text{control}} = 10$ ;  $p = 0.57$ ). B: Average walking time (mean + standard error) towards the different light sources. Light intensity did not affect walking time (ANOVA with RM, factor light intensity:  $F_{(5, 90)} = 1.4$ ,  $p = 0.25$ ). Puncturing the median ocellus also did not affect walking times (ANOVA, factor treatment:  $F_{(1, 18)} = 0.2$ ,  $p = 0.67$ ).
